# Supplementary material
Source: publisher figshare collection journal article supplement (https://tandf.figshare.com/ndownloader/files/38558285)
Supplement: Supplementary file 1 [file 38558285]

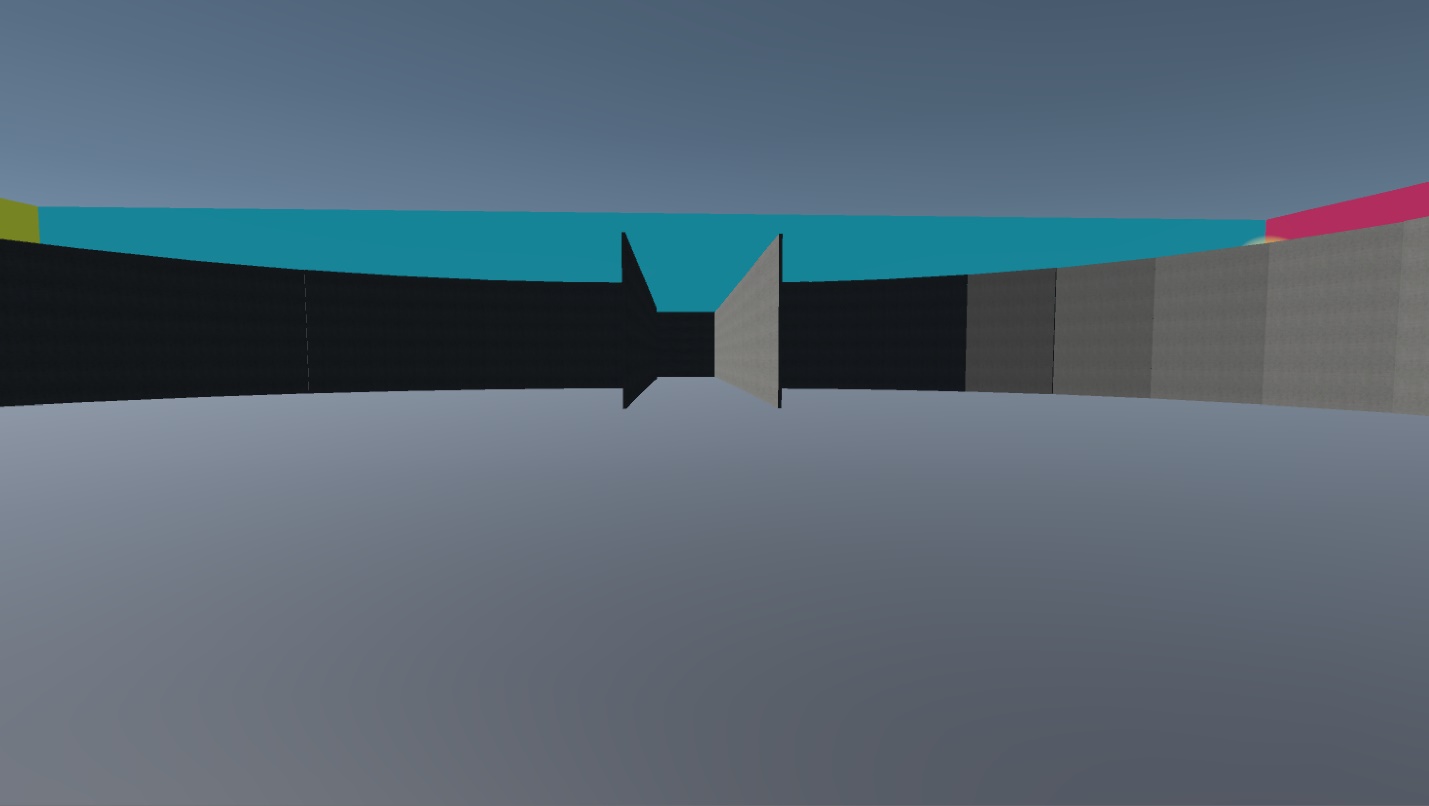


Supplemental 3: Center on hallway CD of the Training environment in the Light Stable condition used in Experiment 2.
